# Supplementary material for: P53-dependent downregulation of hTERT protein expression and telomerase activity induces senescence in lung cancer cells as a result of pterostilbene treatment
Source: PubMed Central journal article supplement (PMC5596539; doi:10.1038/cddis.2017.333), 2017-08-10

# Supplementary Data Figure 2

(A)

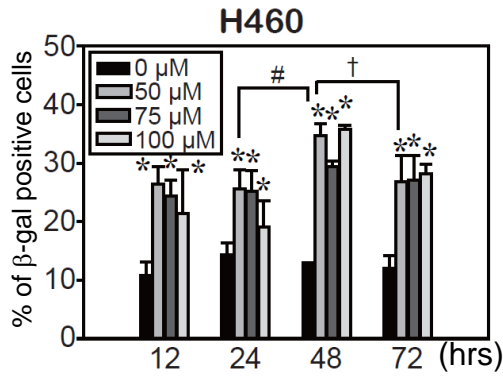

(B)

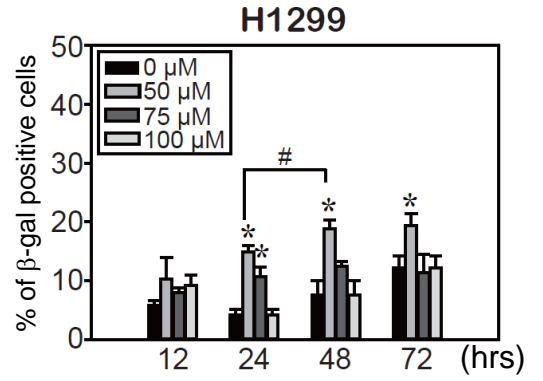

(C)

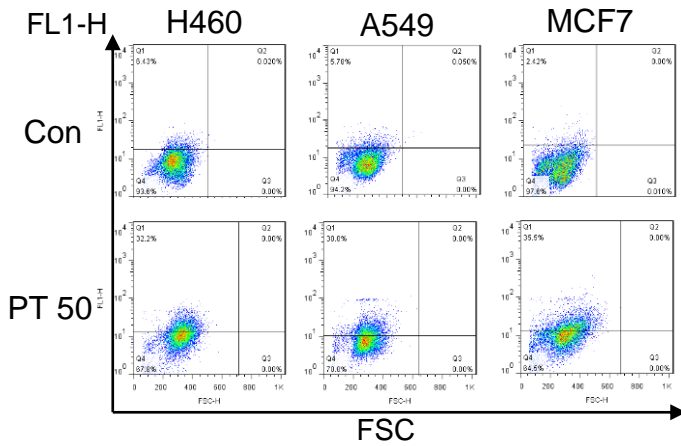

(D)

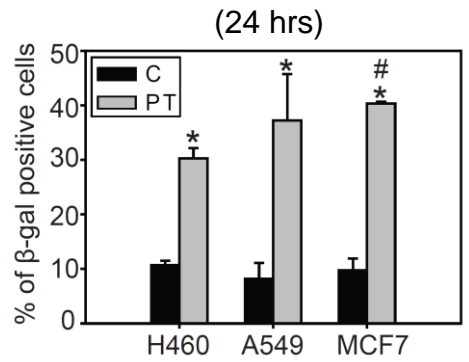

Supplement: cddis2017333x2.pdf [file cddis2017333x2.pdf]
