# Supplementary material for: P53-dependent downregulation of hTERT protein expression and telomerase activity induces senescence in lung cancer cells as a result of pterostilbene treatment
Source: PubMed Central journal article supplement (PMC5596539; doi:10.1038/cddis.2017.333), 2017-08-10

Supplementary data Figure 3

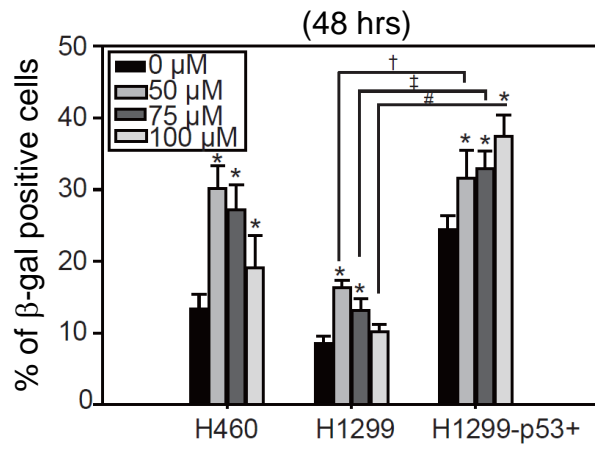

Supplement: cddis2017333x3.pdf [file cddis2017333x3.pdf]
